# **A serum-free and insulin-supplemented cell culture medium ensures fatty acid synthesis gene activation in cancer cells**

Su Wu<sup>1,2\*</sup> and Anders M. Näär<sup>1,2, #\*</sup>

<sup>1</sup> Massachusetts General Hospital Center for Cancer Research, Charlestown, Massachusetts, United States of America

<sup>2</sup> Department of Cell Biology, Harvard Medical School, Boston, Massachusetts, United States of America

<sup>#</sup>Current Address: Department of Nutritional Sciences & Toxicology, University of California, Berkeley, California, United States of America

\* Corresponding authors

E-mail: [swu16@mgh.harvard.edu](mailto:swu16@mgh.harvard.edu) (SW) and [naar@berkeley.edu](mailto:naar@berkeley.edu) (AMN)

## 17 **Abstract**

18           While investigating the role played by *de novo* fatty acid biosynthesis (DNFA)  
 19 in cancer cells, we sought a medium condition that would support cell proliferation  
 20 without providing any serum lipids. Here we report that a defined serum free cell culture  
 21 medium condition containing insulin, transferrin and selenium (ITS) supports  
 22 controlled study of DNFA regulation in melanoma cell lines. This lipid-free ITS  
 23 medium is able to support proliferation of melanoma cell lines that fulfill their lipid  
 24 requirements via DNFA. We show that the ITS medium stimulates gene transcription  
 25 in support of both DNFA and *de novo* cholesterol synthesis (DNCS), specifically  
 26 mediated by SREBP1/2 in melanoma cells. We further found that the ITS medium  
 27 promoted SREBP1 nuclear localization and occupancy on DNFA gene promoters. Our  
 28 data show clear utility of this serum and lipid-free medium for melanoma cancer cell  
 29 culture and lipid-related areas of investigation.

## Introduction

*de novo* fatty acid biosynthesis (DNFA) is the metabolic pathway that converts carbohydrates into fatty acids. In healthy adults, DNFA occurs in liver and adipose tissues for energy storage or distribution to other tissues. Many malignant cancer cells also exhibit elevated DNFA as a hallmark adaptation to support proliferation and survival (1, 2). Certain cancer cells can proliferate entirely by relying on lipids generated from DNFA; others rely additionally upon lipid uptake (3). However, DNFA appears to be required for cell survival even with the presence of external lipids, suggesting that DNFA is essential for cancer cells regardless of proliferative state (3). Thus, DNFA is of particular interest as a potential therapeutic target for cancers (4, 5). DNFA is primarily regulated at the mRNA level of catalytic enzymes that drive the biosynthetic reactions (6), a transcriptional process under the control of the sterol regulatory element-binding protein 1 (SREBP1) (7). However, DNFA gene regulation is still not fully understood at the molecular level. Cell culture studies of DNFA with widely-accepted serum-containing medium conditions are often confounded by the presence of external lipids, with consequent difficulty to disentangle the respective effects of lipid synthesis and lipid uptake, both of which may occur even among cells that are able to survive and proliferate using DNFA alone (7, 8).

Most cell culture media are composed of serum supplements and basal mediums (BMs), each of which may contain confounding factors for DNFA studies. Typical serum often contains external lipids in two forms: non-esterified free fatty acids (FFAs) associated with albumin, and lipoproteins that carry triglycerides, cholesterol and phospholipids encapsulated by apoproteins (9, 10). Cells can take up FFAs *via* physical diffusion across the cellular membrane (11) or *via* active transport aided by membrane-associated protein CD36 or FATPs (12). Lipoprotein uptake occurs when a lipoprotein binds to a cell surface receptor (e.g. LDL receptor; LDLR) and the bound

lipoprotein/receptor complex undergoes endocytosis (13). After transport from serum to cells, both FFAs and lipoprotein lipids are potent DNFA inhibitors (14). Intracellular cholesterol interferes with retrograde trafficking of SREBP1 from the ER to the Golgi apparatus – an essential step in post-translational processing and maturation of SREBP1 – and consequently inhibits DNFA enzyme expression (7). Polyunsaturated FFAs have also been observed to inhibit both SREBP1 mRNA transcription and protein maturation, resulting in decreased expression of DNFA enzyme genes (15-17). Lipid metabolism studies have often employed lipoprotein-deficient serum (LPDS), in which lipoproteins are removed by ultracentrifugation, but FFAs – which are confounding for DNFA studies – are retained (18). An alternative is delipidated serum (8), but that is prepared by organic solvent extraction and is not completely lipid-free (19). Preparation protocols vary widely in organic solvent composition and extraction time, and quality variation between batches is common (20, 21).

Basal media (BM) often contain glucose, which besides its bioenergetic role as fuel for ATP synthesis also serves as a carbon source for biosynthesis of amino acids, nucleotides, other carbohydrates, and lipids. Two of the most common BMs for cancer cell culture are Roswell Park Memorial Institute (RPMI) 1640 medium (22), with 11.11 mM glucose concentration (normal glucose level); and Dulbecco's modified Eagle's medium (DMEM), which contains 25 mM glucose (high glucose level). In cultured hepatocytes and adipocytes, high glucose conditions stimulate lipogenesis and DNFA gene expression (23, 24). Healthy livers employ glucose for DNFA principally by glycolytic citrate generation and the tricarboxylic acid (TCA) cycle with oxidative phosphorylation (25, 26). Glycolysis produces pyruvate that mitochondria metabolize into citrate and ATP in the TCA cycle. The citrate then translocates to cytosol where it is cleaved by ATP-citrate lyase (ACLY) to produce acetyl-CoA as a substrate for DNFA (27-29). In contrast to healthy livers, tumors display enhanced glycolytic

activity but impaired oxidative phosphorylation. Pyruvate is often metabolized to lactate within the cytoplasm of cancer cells preferentially to the TCA cycle (Warburg effect) (30). Furthermore, elevated glucose stimulates glycolysis and inhibits aerobic respiration in tumors (Crabtree effect) (31). Thus, high-glucose BMs promote conversion of glucose to pyruvate and NADH generation but inhibit production of substrates for DNFA via the TCA cycle (32, 33). In general, the glucose content of DMEM may distort normal cellular behavior and thus render it unsuitable for molecular study of DNFA transcription regulation. Both aerobic respiration and anaerobic glycolysis contribute to glucose catabolism in cancer cells cultured with RPMI-1640 medium (34). Therefore, between the two common BMs, RPMI-1640 seems preferable for lipogenesis-related investigations of cancer cells.

The commercially available insulin, transferrin, and selenium (ITS) supplement is a serum replacement, supporting cell survival and growth but containing no lipids. ITS supplement has been used for *in vitro* culture of mesenchymal stem cells isolated from adipose or cartilage tissues, to maintain their differentiation and proliferation capacities for tissue transplantation (35, 36). Insulin is a growth factor with a mitogenic effect in cell culture that promotes the uptake of glucose and amino acids (37, 38). In livers, insulin stimulates *SREBF1c* mRNA expression (23) as well as its proteolytic processing to stimulate DNFA gene expression (23, 39). Transferrin is a glycoprotein that transports  $Fe^{3+}$  in blood plasma and delivers  $Fe^{3+}$  to cells through binding to transferrin receptor on cell surface (41).  $Fe^{3+}$  is an essential component of heme-containing enzymes like cytochromes for oxidative phosphorylation process and various non-heme iron enzymes, such as ribonucleotide reductase for DNA synthesis (42). Transferrin provides  $Fe^{3+}$  necessary to support cell survival and proliferation in culture (43). Selenium is required for proper function of antioxidant enzymes, including glutathione peroxidase and thioredoxin reductase, in which selenocysteine is

indispensable for their catalytic activities (44). Components of ITS have been individually assembled in various serum-free media to support cell growth in cancer studies (45), but reports relevant to lipid metabolism are missing. Here, we introduce the combination of RPMI-1640 and ITS (ITS medium) as a straightforward serum-free medium condition for activating DNFA gene expression in cancer cell culture. The ITS medium stimulates cell growth, exhibits consistent effect across batches, and is free of confounding lipid factors. We expect that it may be adopted for investigations in lipid metabolism and will facilitate *in vitro* screening for inhibitors of DNFA pathway.

## Materials and Methods

### Cell culture reagent

The melanoma cell line HT-144 was obtained from the MGH Center for Molecular Therapeutics. Cell line was cultured in RPMI-1640 medium (21870092, Thermo Fisher Scientific) with 10% fetal bovine serum (Gibco), 2 mM L-glutamine (Gibco) and 50 U/ml penicillin-streptomycin (Gibco) in a 37 °C incubator with 5% CO<sub>2</sub>. 0% FBS medium contained RPMI-1640 medium, with 2 mM L-glutamine (Gibco) and 50 U/ml penicillin-streptomycin (Gibco). 1% ITS medium contained the RPMI-1640 medium with 1× Insulin-Transferrin-Selenium (ITS-G, Thermo Fisher Scientific), 2 mM L-glutamine (Gibco) and 50 U/ml penicillin-streptomycin (Gibco).

### Cell proliferation assay

For proliferation assay, HT-144 cells were seeded at a density of 5,000 cells per well in 24-well plates (Corning) in RPMI-1640 medium with 10% FBS. Sixteen hours after seeding, cells were washed twice with PBS buffer and then cultured in three

different medium conditions for 6 days. Relative cell viability was quantified with the alamarBlue cell viability reagent (DAL1025, Thermo Fisher Scientific) and fluorescence signals were measured with the Envision 2103 multilabel microplate reader (Perkin Elmer). Each data point was measured with four replicates. Because the culture medium influences resazurin fluorescence, the background fluorescence of medium-only with alamarBlue reagent was subtracted for data normalization.

## Reverse transcription quantitative PCR (RT-qPCR)

Total RNA was isolated from cultured cells using the RNeasy mini kit (Qiagen) and treated with RNase-free DNase (Qiagen). RNA concentrations were quantified with Qubit™ RNA BR assay kit (Thermo Fisher Scientific). 1 µg RNA was used for cDNA synthesis with RNA to cDNA EcoDry™ premix (TaKaRa) containing both random hexamer and oligo(dT)18 primers (Double Primed). qPCR was carried out in triplicates on a LightCycler® 480 instrument (Roche) using LightCycler® 480 SYBR green I master (Roche). qPCR primers were pre-designed by MGH primer bank (<https://pga.mgh.harvard.edu/primerbank/>) and the primer sequences are listed in Table 1. Relative gene expression levels were calculated using the  $2^{-\Delta\Delta C_t}$  method, normalized to the 18S housekeeping gene, and the mean of negative control samples was set to 1.

**Table 1. The primers used for RT-qPCR.**

|                      |                                   |
|----------------------|-----------------------------------|
| <i>ACACA</i> forward | 5' – ATGTCTGGCTTGCACCTAGTA – 3'   |
| <i>ACACA</i> reverse | 5' – CCCCAAAGCGAGTAACAAATTCT – 3' |
| <i>ACLY</i> forward  | 5' – TCGGCCAAGGCAATTCAGAG – 3'    |
| <i>ACLY</i> reverse  | 5' – CGAGCATACTTGAACCGATTCT – 3'  |
| <i>ACSS2</i> forward | 5' – AAAGGAGCAACTACCAACATCTG – 3' |

|                       |                                   |
|-----------------------|-----------------------------------|
| <i>ACSS2</i> reverse  | 5' – GCTGAACTGACACACTTGGAC – 3'   |
| <i>FASN</i> forward   | 5' – AAGGACCTGTCTAGGTTTGATGC – 3' |
| <i>FASN</i> reverse   | 5' – TGGCTTCATAGGTGACTTCCA – 3'   |
| <i>SCD</i> forward    | 5' – TCTAGCTCCTATACCACCACCA – 3'  |
| <i>SCD</i> reverse    | 5' – TCGTCTCCAACCTTATCTCCTCC – 3' |
| <i>ACSL1</i> forward  | 5' – CCATGAGCTGTTCCGGTATTT – 3'   |
| <i>ACSL1</i> reverse  | 5' – CCGAAGCCCATAAGCGTGTT – 3'    |
| <i>SREBF1</i> forward | 5' – ACAGTGACTTCCCTGGCCTAT – 3'   |
| <i>SREBF1</i> reverse | 5' – GCATGGACGGGTACATCTTCAA – 3'  |
| <i>SREBF2</i> forward | 5' – AACGGTCATTCACCCAGGTC – 3'    |
| <i>SREBF2</i> reverse | 5' – GGCTGAAGAATAGGAGTTGCC – 3'   |
| <i>HMGCS1</i> forward | 5' – GATGTGGAATTGTTGCCCTT – 3'    |
| <i>HMGCS1</i> reverse | 5' – ATTGTCTCTGTTCCAACCTCCAG – 3' |
| <i>HMGCR</i> forward  | 5' – TGATTGACCTTTCCAGAGCAAG – 3'  |
| <i>HMGCR</i> reverse  | 5' – CTAAAATTGCCATTCCACGAGC – 3'  |
| <i>LDLR</i> forward   | 5' – ACCAACGAATGCTTGGACAAC – 3'   |
| <i>LDLR</i> reverse   | 5' – ACAGGCACTCGTAGCCGAT – 3'     |
| 18S forward           | 5' – GTAACCCGTTGAACCCATT – 3'     |
| 18S reverse           | 5' – CCATCCAATCGGTAGTAGCG – 3'    |

152

## 153 **siRNA transfection**

154       The human-specific siRNAs targeting *SREBF1* (6720) and *SREBF2* (6721)  
155       were the pre-designed ON-TARGETplus SMARTpool siRNA reagents from  
156       Dharmacon. Each ON-TARGETplus SMARTpool siRNA was a mixture of four siRNA  
157       duplexes. siRNAs were suspended in RNase-free 1 × siRNA Buffer (Dharmacon) to



yield 20  $\mu$ M stock solutions. HT-144 cells were transfected with siRNAs at final concentration of 50 nM using Lipofectamine RNAiMAX transfection reagent (Thermo Fisher Scientific) at a density of  $2 \times 10^5$  cells/ well in a 6-well plate. For each transfection, 2.5  $\mu$ l of siRNA stock solution was mixed with 4  $\mu$ l of Lipofectamine RNAiMAX in 200  $\mu$ l of Opti-MEM I medium and then incubated for 10-20 minutes at room temperature. HT-144 cells were diluted in 10% FBS/RPMI-1640 medium without antibiotics so that 800  $\mu$ l medium contains  $2.5 \times 10^5$  HT-144 cells. 200  $\mu$ l of siRNA/Lipofectamine RNAiMAX complexes was mixed with 800  $\mu$ l of the diluted HT-144 cells in one well of a 6-well plate. Transfected HT-144 cells were incubated at 37°C for 16 hours before medium changes.

## **Immunoblot assay**

HT-144 cells were seeded in 10 cm<sup>2</sup> plates (Corning) in 10% FBS/RPMI-1640 medium at day one. Sixteen hours after seeding, cells were washed twice with PBS buffer and then cultured in different medium conditions. Total cell lysate was harvested with RIPA buffer containing protease inhibitors (protease inhibitor cocktail tablets, Roche) on the third day. Nuclear and cytoplasmic protein fractions were prepared with NE-PER™ nuclear and cytoplasmic extraction reagents (Thermo Fisher Scientific). Protein samples were separated on the 4-15% Mini-PROTEAN® TGX™ precast SDS-PAGE gels (Bio-Rad) and then transferred to polyvinyl difluoride (PVDF) membranes (Immobilon-P, Millipore) for immunoblot analysis. The following primary antibodies were used: mouse anti-SREBP1 (IgG-2A4, BD Biosciences), rabbit anti-FASN (C20G5, Cell Signaling), rabbit anti-SCD (23393-1-AP, Proteintech), rabbit anti-ACSL1 (D2H5, Cell Signaling), rabbit anti-histone H3 (9715, Cell Signaling) and rabbit anti-beta-actin (13E5, Cell Signaling). After being incubated with primary antibodies overnight in PBST solution with 5% non-fat dry milk, immunoblot

membranes were probed with HRP-conjugated affinity-purified donkey anti-mouse or anti-rabbit IgG (GE Healthcare) as secondary antibodies and visualized with the immobilon Western Chemiluminescent HRP substrate (Millipore).

## **Chromatin immunoprecipitation (ChIP) quantitative PCR (ChIP-qPCR)**

For each ChIP assay,  $5 \times 10^7$  HT-144 cells were used. HT-144 cells were seeded in 10% FBS medium, and then medium was replaced with 10% FBS or 1% ITS medium and cultured for 24 hours before ChIP-qPCR analyses. Chromatin from HT-144 cells was fixed with 1% formaldehyde (Polysciences) and prepared with Magna ChIP™ HiSens chromatin immunoprecipitation kit (EMD Millipore). Nuclei were sonicated on a sonic dismembrator 550 (Fisher Scientific) with a microtip (model 419) from Misonix Inc. Lysates were sonicated on ice with 10 pulses of 20 seconds each (magnitude setting of 3.5) and a 40-sec rest interval. The supernatant was used for immunoprecipitation with the following antibodies: rabbit anti-SREBP1 (H-160, Santa Cruz Biotechnology), rabbit anti-CBP (C-22, Santa Cruz Biotechnology), rabbit anti-RNA polymerase II (8WG16, BioLegend) and rabbit anti-histone H3 (acetyl K27) (ab4729, Abcam). qPCR reactions in triplicates were performed on a LightCycler® 480 instrument (Roche) using LightCycler® 480 SYBR green I master (Roche). The ChIP-qPCR primers were designed with software Primer 3. The primer sequences are listed in Table 2.

### **Table 2. The primers used for ChIP-qPCR.**

|               |                                |
|---------------|--------------------------------|
| SCD 12F (TSS) | 5' – GTGGCACCAAATTCCCTTCG – 3' |
| SCD 12R (TSS) | 5' – GACACCGACACCACACCA – 3'   |
| SCD 245F      | 5' – CTTGGCAGCGGATAAAAGGG – 3' |
| SCD 245R      | 5' – GCACGCTAGCTGGTTGTC – 3'   |

206

## 207 **Results**

### 208 **A lipid-free and insulin-supplemented (ITS) medium** 209 **supports melanoma cell proliferation**

210 We performed time-course analysis to measure cell growth rates of a melanoma  
211 cell line, HT-144, under three different cell culture medium conditions: RPMI-1640  
212 supplemented with either 10% FBS, 0% FBS, or 1% ITS. Viable HT-144 cells were  
213 quantified with alamarBlue daily for six days. We found that HT-144 cells cultured in  
214 10% FBS and 1% ITS medium conditions displayed a time-dependent increase of  
215 fluorescence reads in the alamarBlue assay (Fig. 1A). We also observed increased cell  
216 number, which confirms that HT-144 cells proliferate in both 10% FBS and 1% ITS  
217 medium conditions. Because 1% ITS medium does not contain any external lipids, the  
218 lipids for membrane synthesis during proliferation are products entirely derived from  
219 DNFA. We observed a growth plateau of HT-144 cells in 0% FBS medium, which lacks  
220 growth factors such as insulin, and in which HT-144 cells therefore remain quiescent.

221 The alamarBlue assay measures the fluorescence emission of resorufin  
222 molecules converted from resazurin by reductants such as NADPH or NADH (46, 47).  
223 The alamarBlue assay is thus an indicator of cellular NADPH/NADH concentration in  
224 living cells. Because cytosolic NADPH serves as the reductant for biosynthesis  
225 pathways such as lipid and nucleic acid synthesis, alamarBlue assay may provide a hint

of the DNFA activity. Therefore, we compared the alamarBlue reads of cells cultured in different medium conditions at day one, when they had the same cell numbers in the three medium conditions. HT-144 cells cultured in 1% ITS medium had the highest fluorescence reads, whereas those in 10% FBS medium had the lowest reads (Fig. 1B). This result suggests that even when the cell number remains the same, HT-144 cells cultured in 1% ITS possibly have higher NADPH/NADH concentrations.

**Fig 1. A lipid-free and insulin-supplemented medium supports proliferative cell state in melanoma cells.**

(A) HT-144 cells were seeded in 10% FBS medium at day zero. On day one, cells were washed with PBS and changed to the indicated medium conditions. Cell proliferation was measured with alamarBlue assay at each day. Each data point represents the mean  $\pm$ SD of quadruplicate samples. The results were analyzed using two-way repeated measures ANOVA followed by *post hoc* Tukey's multiple comparison tests. For culture time,  $F = 1505$ ,  $P < 0.0001$ ; for culture condition,  $F = 2153$ ,  $P < 0.0001$ ; for interaction between culture time and condition,  $F = 409.4$ ,  $P < 0.0001$ . (B) HT-144 cells were seeded in 10% FBS medium at day zero. On day one, cells were washed with PBS and changed to the indicated medium conditions. alamarBlue assay was performed on the cells cultured in the indicated medium for one hour. Results were analyzed using one-way ANOVA followed by *post hoc* Tukey's multiple comparison tests.  $F = 202.7$ . Significant differences between medium conditions are indicated as \* $P < 0.05$ , \*\* $P < 0.01$ , \*\*\* $P < 0.001$  and \*\*\*\* $P < 0.0001$ . ns, not significant.

## ITS medium increases DNFA and DNCS gene expression in melanoma cells

To determine whether the increase of fluorescence emission by resorufin in 1% ITS condition (Fig. 1B) was due to elevated DNFA activity, we performed RT-qPCR analyses of DNFA mRNA, including *ACLY*, *ACSS2*, *ACACA*, *FASN*, *SCD*, and *ACSL1*. We also examined the expression of *de novo* cholesterol synthesis (DNCS) genes, including *HMGCS1* and *HMGCR*. HT-144 cells were seeded in 10% FBS medium, and then medium was replaced with 0% FBS or 1% ITS medium and cultured for 24 hours before RT-qPCR analyses. We observed a significant increase in the expression of DNFA (Fig. 2A-F), DNCS (Fig. 2G, H) and *LDLR* (Fig. 2I) genes when comparing cells cultured in 0% FBS and 1% ITS medium conditions to cells in 10% FBS medium. DNFA and DNCS gene expression remained higher in 0% FBS and 1% ITS three days after changing the media (data not shown). These results suggest that the increase in lipogenic gene expression persists in cells cultured in 0% FBS and 1% ITS media. We observed lower DNFA and DNCS gene expression in cells cultured in 10% FBS medium than in 0% FBS medium, consistent with repression of DNFA and DNCS by lipids derived from the serum supplement.

Figure 1A indicates that HT-144 cells remain quiescent in 0% FBS medium and proliferate in 1% ITS. Quiescent HT-144 cells have enhanced DNFA and DNCS gene expression, even though there is no requirement for membrane lipid synthesis to support proliferation, and the reasons for this remain unclear. DNFA and DNCS gene expression is elevated in 1% ITS medium as compared with 0% FBS medium, which may suggest that the insulin component of the ITS supplement contributes to stimulation of DNFA gene expression.

We further observed significantly increased expression of *SREBF1* and *SREBF2* genes in cells cultured in 0% FBS and 1% ITS medium conditions, compared

to 10% FBS medium (Fig. 2J, K). These results suggest that SREBP1 and SREBP2 are transcriptionally activated in lipid-free and insulin-supplemented conditions. Because SREBP1/2 can bind to the sterol regulatory element (SRE) at its own promoter, SREBP1/2 protein possibly regulate its mRNA production through auto-activation (48) and potentially contributes to elevated DNFA and DNCS gene expression.

## **Figure 2. Lipid depletion combined with insulin supplement yields increased expression of lipogenic genes.**

(A-K) The expression level of DNFA and DNCS genes was analyzed by RT-qPCR assay. HT-144 cells were cultured in 10%, 0% FBS or 1% ITS medium for 24 hours. Significant differences between medium conditions are indicated as \* $P < 0.05$ , \*\* $P < 0.01$ , \*\*\* $P < 0.001$  and \*\*\*\* $P < 0.0001$  using one-way ANOVA followed by *post hoc* Tukey's multiple comparison tests. ns, not significant. Each data point represents the mean  $\pm$ SD of results from quadruplicate samples.

## **ITS medium increases DNFA and DNCS gene expression via SREBP1 and SREBP2, respectively**

SREBP1 and SREBP2 are the master transcription regulators of DNFA and DNCS pathways, respectively (49). To verify cellular dependence on SREBP1 and SREBP2 for lipid biosynthesis pathways, we transfected HT-144 cells with pooled siRNAs to deplete mRNAs encoding *SREBF1* and *SREBF2*. The transfected cells were cultured in 10% FBS, 0% FBS or 1% ITS medium conditions for two days and then assayed with RT-qPCR for DNFA (Fig. 3) and DNCS (Fig. 4) gene expression.

In the group treated with scrambled siRNA (blue bars in Figs. 3 and 4), we found that DNFA and DNCS gene expression was significantly elevated in 0% FBS

and 1% ITS medium conditions compared to 10% FBS, consistent with our observations in Fig. 2. However, the DNFA gene expression is significantly less in the *SREBF1* depleted group than in the scramble siRNA group, particularly in 0% FBS and 1% ITS medium conditions (Fig. 3A-F, statistical comparisons marked in black). The DNCS gene expression is significantly less in the *SREBF2* depleted group than in the scramble siRNA group, in 0% FBS and 1% ITS medium conditions (Fig. 4A, B, statistical comparisons marked in black). Two-way ANOVA analysis detects a significant interaction between *SREBF1/2* depletion and medium condition for DNFA and DNCS gene expression. This result provides a statistical indication that SREBP1 and SREBP2 participated in activation of lipogenic gene expression in 0% FBS and 1% ITS conditions. We further found that *SREBF1* siRNA has the greatest effect on DNFA gene expression (Fig. 3A-F), and *SREBF2* siRNA has the greatest effect on DNCS gene expression (Fig. 4A, B). LDLR appears to be regulated primarily through SREBP1 rather than SREBP2 (Fig. 4C). Our results are consistent with known roles for SREBP1 and SREBP2 in activation of DNFA and DNCS gene expression (49).

In scrambled siRNA treated groups, we observed significantly higher DNFA and DNCS gene expression in 1% ITS than in 0% FBS medium, suggesting additional influence of the ITS supplement on DNFA gene expression (Figs. 3 and 4, statistical comparisons marked in blue). In *SREBF1*-depleted group, we observed no significant increase of DNFA gene expression when comparing 1% ITS to 0% FBS condition (Fig. 3A-F, statistical comparisons marked in red). Similarly, in *SREBF2*-depleted group there is no significant elevated expression of DNCS genes, *HMGCS1* and *HMGCR*, in 1% ITS medium compared to 0 % FBS (Fig. 4A, B, statistical comparisons marked in green). Altogether, these results support the utility of the 1% ITS medium condition to study SREBP1- and SREBP2-targeted interventions to inhibit DNFA and DNCS respectively, in the absence of confounding serum lipids.

**Fig 3. DNFA gene expression of HT-144 cells increases in ITS medium, and this increase is dependent upon SREBPs.**

(A-F) HT-144 cells were transfected over one day with siRNAs at 50 nM concentrations for non-target control, *SREBF1* or *SREBF2*. Transfected cells were cultured in 10%, 0% FBS or 1% ITS for two more days before RT-qPCR analyses. RT-qPCR results are presented as expression of DNFA genes relative to their expression under scramble siRNA treatment (siNegative) in 10% FBS medium (set as 1 and marked with a dashed line). When a significant interaction between siRNA treatment and medium condition was detected by two-way ANOVA, individual gene expression was compared within groups by *post hoc* Tukey's multiple comparison tests. Each data point represents the mean  $\pm$ SD of triplicate samples. \*,  $P < 0.05$ ; \*\*,  $P < 0.01$ ; \*\*\*,  $P < 0.001$ ; \*\*\*\*,  $P < 0.0001$ .

**Fig 4. DNCS gene expression of HT-144 cells increases in ITS medium, and this increase is dependent upon SREBPs.**

(A-E) HT-144 cells were transfected over one day with siRNAs at 50 nM concentrations for non-target control, *SREBF1* or *SREBF2*. Transfected cells were cultured in 10%, 0% FBS or 1% ITS for two more days before RT-qPCR analyses. RT-qPCR results are presented as expression of genes relative to their expression under scramble siRNA treatment (siNegative) in 10% FBS medium (set as 1 and marked with a dashed line). When a significant interaction between siRNA treatment and medium condition was detected by two-way ANOVA, individual gene expression was compared within groups by *post hoc* Tukey's multiple comparison tests. Each data point



represents the mean  $\pm$ SD of triplicate samples. \*,  $P < 0.05$ ; \*\*,  $P < 0.01$ ; \*\*\*,  $P < 0.001$ ; \*\*\*\*,  $P < 0.0001$ .

## ITS medium increases the level of nuclear SREBP1

To confirm that lipid-free and/or insulin-supplemented medium conditions influence SREBP1 protein production in general and its nuclear form in particular, we examined the cytoplasmic and nuclear levels of SREBP1 in HT-144 cells cultured under the three conditions (Fig. 5A). Our results revealed a dramatic increase of nuclear SREBP1 in 0% FBS and 1% ITS medium conditions. However, we did not observe a decrease of full-length SREBP1 in the cytoplasmic fraction from 0% FBS and 1% ITS medium conditions. The overall SREBP1 protein level increased in 0% FBS and 1% ITS medium conditions, which is likely due to transcriptional activation of the *SREBF1* gene in Fig. 2J.

Consistent with the increased mRNA for DNFA genes (Fig. 2D-F), there is increased production of DNFA enzymes including FASN, SCD and ACSL1 in the cytoplasmic fraction from 0% FBS and 1% ITS medium conditions. The increase of DNFA enzyme production correlates with the increase of nuclear SREBP1. We interpret this as evidence that lipid depletion combined with insulin supplement greatly enhances the abundance of the SREBP1 nuclear form and thus stimulates DNFA enzyme production.

## Fig 5. Lipid depletion combined with insulin supplement yields increased expression of nuclear SREBP1.

(A) The cytoplasmic and nuclear fractions of HT-144 cells cultured in 10%, 0% FBS or 1% ITS medium were isolated for Western blot analysis. HT-144 cells in 1% ITS medium have increased levels of nuclear SREBP1 protein and lipogenic enzymes,

detected with the indicated antibodies. Histone H3 serves as the positive control for nuclear fractionation during biochemical preparation of the cell samples.

## **Culture in ITS medium increases SREBP1 binding at the *SCD* gene promoter**

Finally, we investigated medium condition impact upon the molecular mechanism by which nuclear SREBP1 controls DNFA gene expression. We used chromatin immunoprecipitation (ChIP)-qPCR to examine the occupancy of SREBP1, transcriptional co-activator CBP (50, 51), RBP1 (the largest subunit of RNA polymerase II) and histone marker H3K27Ac (a marker for active enhancers and promoters) (52) on the promoter of DNFA gene *SCD* (Fig. 6A-D). We observed a significant increase of SREBP1 and CBP binding at the *SCD* transcription start site (TSS) in 1% ITS relative to 10% FBS (Fig. 6A, C, statistical comparisons marked in black). A corresponding slight increase of RBP1 at the *SCD* TSS site is not statistically significant, however we observe a significant RBP1 increase downstream of TSS in the gene body (Fig. 6B, statistical comparisons marked in black), consistent with active RNA polymerase II elongation (3). 1% ITS does not significantly increase the H3K27Ac signal at the *SCD* TSS nor downstream in the gene body compared to 10% FBS (Fig. 6D, statistical comparisons marked in black). However, we observed abundant H3K27Ac signals in the gene body for both 10% and 1% ITS (Fig. 6D, statistical comparisons marked in blue and red). This result suggests that the *SCD* gene body may be constitutively active, with open chromatin architecture.

Two-way ANOVA analysis detects significant interactions between gene locus and medium condition in SREBP1 and RNA polymerase II ChIP-qPCR data. This result indicates that 1% ITS significantly promotes enrichment of SREBP1 at TSS region and RNA polymerase II at gene body region. We reason that, in 1% ITS medium,

the likely transcription regulation mechanism after SREBP1 binding is promotion of the transition from RNA polymerase II pausing to active elongation (3).

## **Fig 6. Lipid depletion combined with insulin supplement increased SREBP1 binding at the *SCD* gene promoter.**

(A-D) ChIP-qPCR analyses for enrichment of transcriptional regulation factors on the TSS and gene body region (245 bp downstream of TSS) of the *SCD* gene locus. qPCR was used to quantify chromatin immunoprecipitated with the indicated antibodies from HT-144 cells cultured in 10% FBS or 1% ITS medium. Quantification of enrichment was determined as percentage of input chromatin before immunoprecipitation. Each data point represents the mean  $\pm$ SD of triplicate samples. Significant differences are indicated as \* $P < 0.05$ , \*\* $P < 0.01$ , \*\*\* $P < 0.001$  and \*\*\*\* $P < 0.0001$  using two-way ANOVA followed by *post hoc* Tukey's multiple comparison tests. ns, not significant.

## **Discussion**

We report here that a serum-free and insulin-supplemented culture medium condition, 1% ITS supplemented RPMI-1640, supports DNFA and DNCS pathway activation as well as proliferation and survival of the human melanoma cell line HT-144. Under this condition, HT-144 cells proliferate while relying entirely on *de novo* lipid synthesis to meet lipid requirements. Expression of DNFA and DNCS enzymes increases significantly in cells when cultured in 1% ITS as compared with other cell culture conditions. We found that 1% ITS medium activates DNFA and DNCS gene expression through the transcription regulators SREBP1 and SREBP2, respectively. In particular, culturing cells in 1% ITS medium promoted the transcription activation of SREBP1 and accumulation of nuclear SREBP1 protein, as compared with other

medium conditions, and cells cultured in 1% ITS medium exhibited further increased binding of SREBP1 at a DNFA gene promoter, consistent with high SREBP1-dependent gene activation under this medium condition.

Unlike free fatty acids, free cholesterol and cholesteryl esters are only minimally soluble in blood and must be transported within lipoproteins (52). Lipoprotein-deficient serum (LPDS) is thus more efficient in removing cholesterol and cholesteryl esters than fatty acids. LPDS has been used in lieu of full serum as an activating medium for SREBPs, because it alleviates sterol inhibition (54). However, LPDS contains free fatty acids that enter cells through passive membrane diffusion or active transport through membrane receptors (55). LPDS has therefore also been used for studies of cellular fatty acid uptake and lipid storage from extracellular fatty acids (56). By contrast, ITS medium contains no external free fatty acids or lipoproteins. Membrane lipids for cell proliferation in ITS medium rely entirely upon DNFA and DNCS. Thus, ITS represents an attractive culture medium as compared with LPDS for studying DNFA-supported proliferation and cell survival of cancer cells.

Our results support the idea that active DNFA is necessary for cell survival but insufficient by itself for cell proliferation. Lipid depletion in 0% FBS activated DNFA and DNCS gene expression, possibly due to removal of exogenous cholesterol, the classic feedback inhibitor of SREBP processing and lipid synthesis (57). HT-144 cells are able to persist and survive under these conditions, but become quiescent, likely due to removal of growth factors in the serum necessary to support active proliferation. This notion is supported by our finding that insulin present in the serum free ITS medium has both metabolic and mitogenic functions in cancer cells, promoting cell survival and active proliferation. It is presently unclear how DNFA is regulated to support cell survival independent of insulin but may involve the AKT/GSK3 signaling pathway (58, 59).

Our data indicate that insulin promotes both SREBP1 processing and transcription. Nuclear SREBP1 was elevated in cells cultured in 1% ITS and 0% FBS media, compared to 10% FBS medium. However, cytoplasmic SREBP1 precursor levels remained similar in both 1% ITS and 10% FBS medium conditions. This could indicate that SREBP1 precursor levels are maintained regardless of whether a portion of SREBP1 has been processed and migrated into the nucleus. Combining these observations with the gene expression data, we believe that insulin also has a stimulative effect on *SREBF1* transcription in cancer cells, in agreement with previous findings from liver (23, 39).

DNFA is necessary for cell survival even in quiescent cancer cells that do not need membrane lipid synthesis for proliferation. In those cells, fatty acid oxidation (FAO) pathway hyperactivity has also been observed (59). DNFA and FAO are antagonistic lipid metabolism pathways that compose a futile cycle in cancer cells, but may represent a metabolic adaptation to promote cell survival under adverse (lipid-depleted) conditions (60). DNFA primarily relies on cytosolic NADPH derived from the pentose phosphate pathway (PPP) by glucose-6-phosphate dehydrogenase (G6PD), malic enzyme (ME) and isocitrate dehydrogenase (IDH1), all of which are direct targets of SREBP1 (62). Cancer cells frequently promote NADPH synthesis to support production of cellular anti-oxidants (e.g. glutathione) to counter elevated reactive oxygen species (ROS). These metabolic adaptations together may then represent a pro-survival mechanism, dependent on SREBP1.

## Conclusions

In summary, we have identified and validated a serum-free and insulin supplemented (ITS) medium condition that is well suited for controlled study of

lipogenic gene activation and its mechanism of action through SREBP processing and nuclear migration, and consequent active transcription elongation in melanomas, and perhaps other cancer cell types.

## Author Contributions

Conceived and designed the experiments: SW and AMN. Performed the experiments: SW. Analyzed the data: SW. Wrote the paper: SW and AMN.

## References

1. Hanahan D, Weinberg RA. Hallmarks of cancer: the next generation. *Cell*. 2011;144(5):646-74.
2. Tisdale MJ. Cancer cachexia: metabolic alterations and clinical manifestations. *Nutrition*. 1997;13(1):1-7.
3. Wu S, Naar A. Elevated de novo fatty acid biosynthesis gene expression promotes melanoma cell survival and drug resistance. *bioRxiv*. 2018(10.1101/441303).
4. Menendez JA, Lupu R. Fatty acid synthase and the lipogenic phenotype in cancer pathogenesis. *Nature reviews Cancer*. 2007;7(10):763-77.
5. Font-Burgada J, Sun B, Karin M. Obesity and Cancer: The Oil that Feeds the Flame. *Cell Metab*. 2016;23(1):48-62.
6. Iritani N. Nutritional and hormonal regulation of lipogenic-enzyme gene expression in rat liver. *Eur J Biochem*. 1992;205(2):433-42.
7. Brown MS, Goldstein JL. The SREBP pathway: regulation of cholesterol metabolism by proteolysis of a membrane-bound transcription factor. *Cell*. 1997;89(3):331-40.

- 502 8. Giles PM, Andrews BJ, Cheshire J, Noble N, Muller DP, Slack J, et al. Effects  
503 of delipidated serum and lipoprotein-deficient serum on sterol biosynthesis and efflux  
504 in cultured skin fibroblasts - a comparison of the behaviour of cells from a control with  
505 those from a heterozygote and homozygote for familial hypercholesterolaemia. *Clinica*  
506 *chimica acta; international journal of clinical chemistry*. 1981;113(2):183-91.
- 507 9. Spector AA. Plasma free fatty acid and lipoproteins as sources of  
508 polyunsaturated fatty acid for the brain. *J Mol Neurosci*. 2001;16(2-3):159-65;  
509 discussion 215-21.
- 510 10. Spector AA. Plasma lipid transport. *Clin Physiol Biochem*. 1984;2(2-3):123-34.
- 511 11. Hamilton JA. Fast flip-flop of cholesterol and fatty acids in membranes:  
512 implications for membrane transport proteins. *Current opinion in lipidology*.  
513 2003;14(3):263-71.
- 514 12. Glatz JF, Luiken JJ, Bonen A. Membrane fatty acid transporters as regulators  
515 of lipid metabolism: implications for metabolic disease. *Physiol Rev*. 2010;90(1):367-  
516 417.
- 517 13. Brown MS, Goldstein JL. A receptor-mediated pathway for cholesterol  
518 homeostasis. *Science*. 1986;232(4746):34-47.
- 519 14. Jump DB. Fatty acid regulation of hepatic lipid metabolism. *Curr Opin Clin*  
520 *Nutr Metab Care*. 2011;14(2):115-20.
- 521 15. Xu J, Nakamura MT, Cho HP, Clarke SD. Sterol regulatory element binding  
522 protein-1 expression is suppressed by dietary polyunsaturated fatty acids. A mechanism  
523 for the coordinate suppression of lipogenic genes by polyunsaturated fats. *The Journal*  
524 *of biological chemistry*. 1999;274(33):23577-83.
- 525 16. Ntambi JM, Bene H. Polyunsaturated fatty acid regulation of gene expression.  
526 *J Mol Neurosci*. 2001;16(2-3):273-8; discussion 9-84.

- 527 17. Landschulz KT, Jump DB, MacDougald OA, Lane MD. Transcriptional control  
528 of the stearyl-CoA desaturase-1 gene by polyunsaturated fatty acids. *Biochem*  
529 *Biophys Res Commun*. 1994;200(2):763-8.
- 530 18. Poumay Y, Ronveaux-Dupal MF. Rapid preparative isolation of concentrated  
531 low density lipoproteins and of lipoprotein-deficient serum using vertical rotor gradient  
532 ultracentrifugation. *Journal of lipid research*. 1985;26(12):1476-80.
- 533 19. Ferraz TP, Fiuza MC, Dos Santos ML, Pontes De Carvalho L, Soares NM.  
534 Comparison of six methods for the extraction of lipids from serum in terms of  
535 effectiveness and protein preservation. *J Biochem Biophys Methods*. 2004;58(3):187-  
536 93.
- 537 20. Capriotti A, Laposata M. Identification of variables critical to reproducible  
538 delipidation of serum. *Journal of Tissue Culture Methods*. 1986;10(4):219-21.
- 539 21. Cham BE, Knowles BR. A solvent system for delipidation of plasma or serum  
540 without protein precipitation. *Journal of lipid research*. 1976;17(2):176-81.
- 541 22. Moore GE, Gerner RE, Franklin HA. Culture of normal human leukocytes.  
542 *JAMA*. 1967;199(8):519-24.
- 543 23. Foretz M, Pacot C, Dugail I, Lemarchand P, Guichard C, Le Liepvre X, et al.  
544 ADD1/SREBP-1c is required in the activation of hepatic lipogenic gene expression by  
545 glucose. *Molecular and cellular biology*. 1999;19(5):3760-8.
- 546 24. Fougelle F, Gouhot B, Pegorier JP, Perdureau D, Girard J, Ferre P. Glucose  
547 stimulation of lipogenic enzyme gene expression in cultured white adipose tissue. A  
548 role for glucose 6-phosphate. *The Journal of biological chemistry*.  
549 1992;267(29):20543-6.
- 550 25. Martin DB, Vagelos PR. The mechanism of tricarboxylic acid cycle regulation  
551 of fatty acid synthesis. *The Journal of biological chemistry*. 1962;237:1787-92.
- 552 26. Rui L. Energy metabolism in the liver. *Compr Physiol*. 2014;4(1):177-97.



- 553 27. Waite M, Wakil SJ. Studies on the mechanism of fatty acid synthesis. XII.  
554 Acetyl coenzyme A carboxylase. The Journal of biological chemistry. 1962;237:2750-  
555 7.
- 556 28. Kallen RG, Lowenstein JM. The stimulation of fatty acid synthesis by isocitrate  
557 and malonate. Arch Biochem Biophys. 1962;96:188-90.
- 558 29. Geelen MJ, Schmitz MG. The role of citrate in the regulation of hepatic fatty  
559 acid synthesis by insulin and glucagon. Horm Metab Res. 1993;25(10):525-7.
- 560 30. Warburg O. On the origin of cancer cells. Science. 1956;123(3191):309-14.
- 561 31. Crabtree HG. Observations on the carbohydrate metabolism of tumours. The  
562 Biochemical journal. 1929;23(3):536-45.
- 563 32. Liberti MV, Locasale JW. The Warburg Effect: How Does it Benefit Cancer  
564 Cells? Trends Biochem Sci. 2016;41(3):211-8.
- 565 33. Vander Heiden MG, Cantley LC, Thompson CB. Understanding the Warburg  
566 effect: the metabolic requirements of cell proliferation. Science. 2009;324(5930):1029-  
567 33.
- 568 34. Han J, Zhang L, Guo H, Wysham WZ, Roque DR, Willson AK, et al. Glucose  
569 promotes cell proliferation, glucose uptake and invasion in endometrial cancer cells via  
570 AMPK/mTOR/S6 and MAPK signaling. Gynecologic oncology. 2015;138(3):668-75.
- 571 35. Chua KH, Aminuddin BS, Fuzina NH, Ruszymah BH. Insulin-transferrin-  
572 selenium prevent human chondrocyte dedifferentiation and promote the formation of  
573 high quality tissue engineered human hyaline cartilage. Eur Cell Mater. 2005;9:58-67;  
574 discussion
- 575 36. Fang B, Song YP, Liao LM, Han Q, Zhao RC. Treatment of severe therapy-  
576 resistant acute graft-versus-host disease with human adipose tissue-derived  
577 mesenchymal stem cells. Bone Marrow Transplant. 2006;38(5):389-90.

- 578 37. Barnes D, Sato G. Serum-free cell culture: a unifying approach. *Cell*.  
579 1980;22(3):649-55.
- 580 38. McKeehan WL, Adams PS, Rosser MP. Direct mitogenic effects of insulin,  
581 epidermal growth factor, glucocorticoid, cholera toxin, unknown pituitary factors and  
582 possibly prolactin, but not androgen, on normal rat prostate epithelial cells in serum-  
583 free, primary cell culture. *Cancer research*. 1984;44(5):1998-2010.
- 584 39. Assimacopoulos-Jeannet F, Brichard S, Rencurel F, Cusin I, Jeanrenaud B. In  
585 vivo effects of hyperinsulinemia on lipogenic enzymes and glucose transporter  
586 expression in rat liver and adipose tissues. *Metabolism*. 1995;44(2):228-33.
- 587 40. Luck AN, Mason AB. Transferrin-mediated cellular iron delivery. *Curr Top*  
588 *Membr*. 2012;69:3-35.
- 589 41. De Domenico I, McVey Ward D, Kaplan J. Regulation of iron acquisition and  
590 storage: consequences for iron-linked disorders. *Nature reviews Molecular cell biology*.  
591 2008;9(1):72-81.
- 592 42. Laskey J, Webb I, Schulman HM, Ponka P. Evidence that transferrin supports  
593 cell proliferation by supplying iron for DNA synthesis. *Experimental cell research*.  
594 1988;176(1):87-95.
- 595 43. Tinggi U. Selenium: its role as antioxidant in human health. *Environ Health*  
596 *Prev Med*. 2008;13(2):102-8.
- 597 44. Brower M, Carney DN, Oie HK, Gazdar AF, Minna JD. Growth of cell lines  
598 and clinical specimens of human non-small cell lung cancer in a serum-free defined  
599 medium. *Cancer research*. 1986;46(2):798-806.
- 600 45. Prabst K, Engelhardt H, Ringgeler S, Hubner H. Basic Colorimetric  
601 Proliferation Assays: MTT, WST, and Resazurin. *Methods in molecular biology*.  
602 2017;1601:1-17.

- 603 46. Rampersad SN. Multiple applications of Alamar Blue as an indicator of  
604 metabolic function and cellular health in cell viability bioassays. *Sensors* (Basel).  
605 2012;12(9):12347-60.
- 606 47. Amemiya-Kudo M, Shimano H, Yoshikawa T, Yahagi N, Hasty AH, Okazaki  
607 H, et al. Promoter analysis of the mouse sterol regulatory element-binding protein-1c  
608 gene. *The Journal of biological chemistry*. 2000;275(40):31078-85.
- 609 48. Horton JD, Goldstein JL, Brown MS. SREBPs: activators of the complete  
610 program of cholesterol and fatty acid synthesis in the liver. *The Journal of clinical*  
611 *investigation*. 2002;109(9):1125-31.
- 612 49. Oliner JD, Andresen JM, Hansen SK, Zhou S, Tjian R. SREBP transcriptional  
613 activity is mediated through an interaction with the CREB-binding protein. *Genes Dev*.  
614 1996;10(22):2903-11.
- 615 50. Ericsson J, Edwards PA. CBP is required for sterol-regulated and sterol  
616 regulatory element-binding protein-regulated transcription. *The Journal of biological*  
617 *chemistry*. 1998;273(28):17865-70.
- 618 51. Creighton MP, Cheng AW, Welstead GG, Kooistra T, Carey BW, Steine EJ, et  
619 al. Histone H3K27ac separates active from poised enhancers and predicts  
620 developmental state. *Proceedings of the National Academy of Sciences of the United*  
621 *States of America*. 2010;107(50):21931-6.
- 622 52. Yang T, Espenshade PJ, Wright ME, Yabe D, Gong Y, Aebersold R, et al.  
623 Crucial step in cholesterol homeostasis: sterols promote binding of SCAP to INSIG-1,  
624 a membrane protein that facilitates retention of SREBPs in ER. *Cell*. 2002;110(4):489-  
625 500.
- 626 53. Pepino MY, Kuda O, Samovski D, Abumrad NA. Structure-function of CD36  
627 and importance of fatty acid signal transduction in fat metabolism. *Annual review of*  
628 *nutrition*. 2014;34:281-303.

629 54. Bensaad K, Favaro E, Lewis CA, Peck B, Lord S, Collins JM, et al. Fatty acid  
630 uptake and lipid storage induced by HIF-1alpha contribute to cell growth and survival  
631 after hypoxia-reoxygenation. *Cell Rep.* 2014;9(1):349-65.

632 55. Goldstein JL, Brown MS. A century of cholesterol and coronaries: from plaques  
633 to genes to statins. *Cell.* 2015;161(1):161-72.

634 56. Shao W, Espenshade PJ. Expanding roles for SREBP in metabolism. *Cell*  
635 *Metab.* 2012;16(4):414-9.

636 57. Kim KH, Song MJ, Yoo EJ, Choe SS, Park SD, Kim JB. Regulatory role of  
637 glycogen synthase kinase 3 for transcriptional activity of ADD1/SREBP1c. *The Journal*  
638 *of biological chemistry.* 2004;279(50):51999-2006.

639 58. Carracedo A, Cantley LC, Pandolfi PP. Cancer metabolism: fatty acid oxidation  
640 in the limelight. *Nature reviews Cancer.* 2013;13(4):227-32.

641 59. Qian H, Beard DA. Metabolic futile cycles and their functions: a systems  
642 analysis of energy and control. *Syst Biol (Stevenage).* 2006;153(4):192-200.

643 60. Shimano H, Yahagi N, Amemiya-Kudo M, Hasty AH, Osuga J, Tamura Y, et  
644 al. Sterol regulatory element-binding protein-1 as a key transcription factor for  
645 nutritional induction of lipogenic enzyme genes. *The Journal of biological chemistry.*  
646 1999;274(50):35832-9.

647

Figure 1.

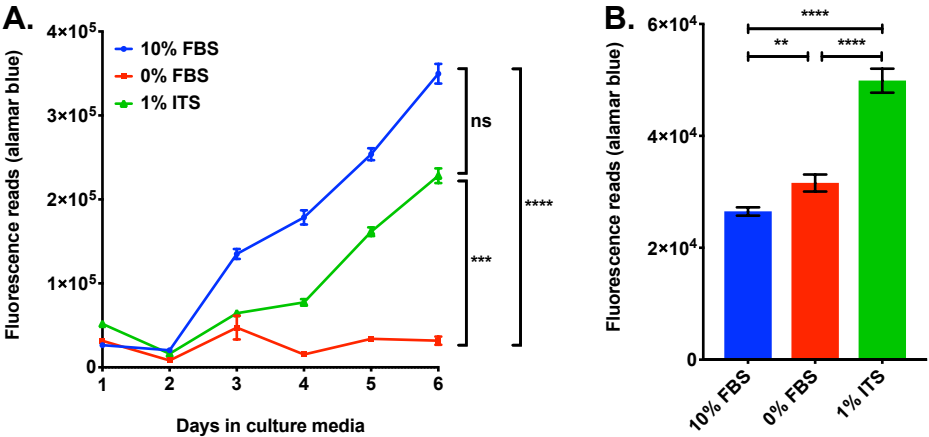

**Figure 2.**

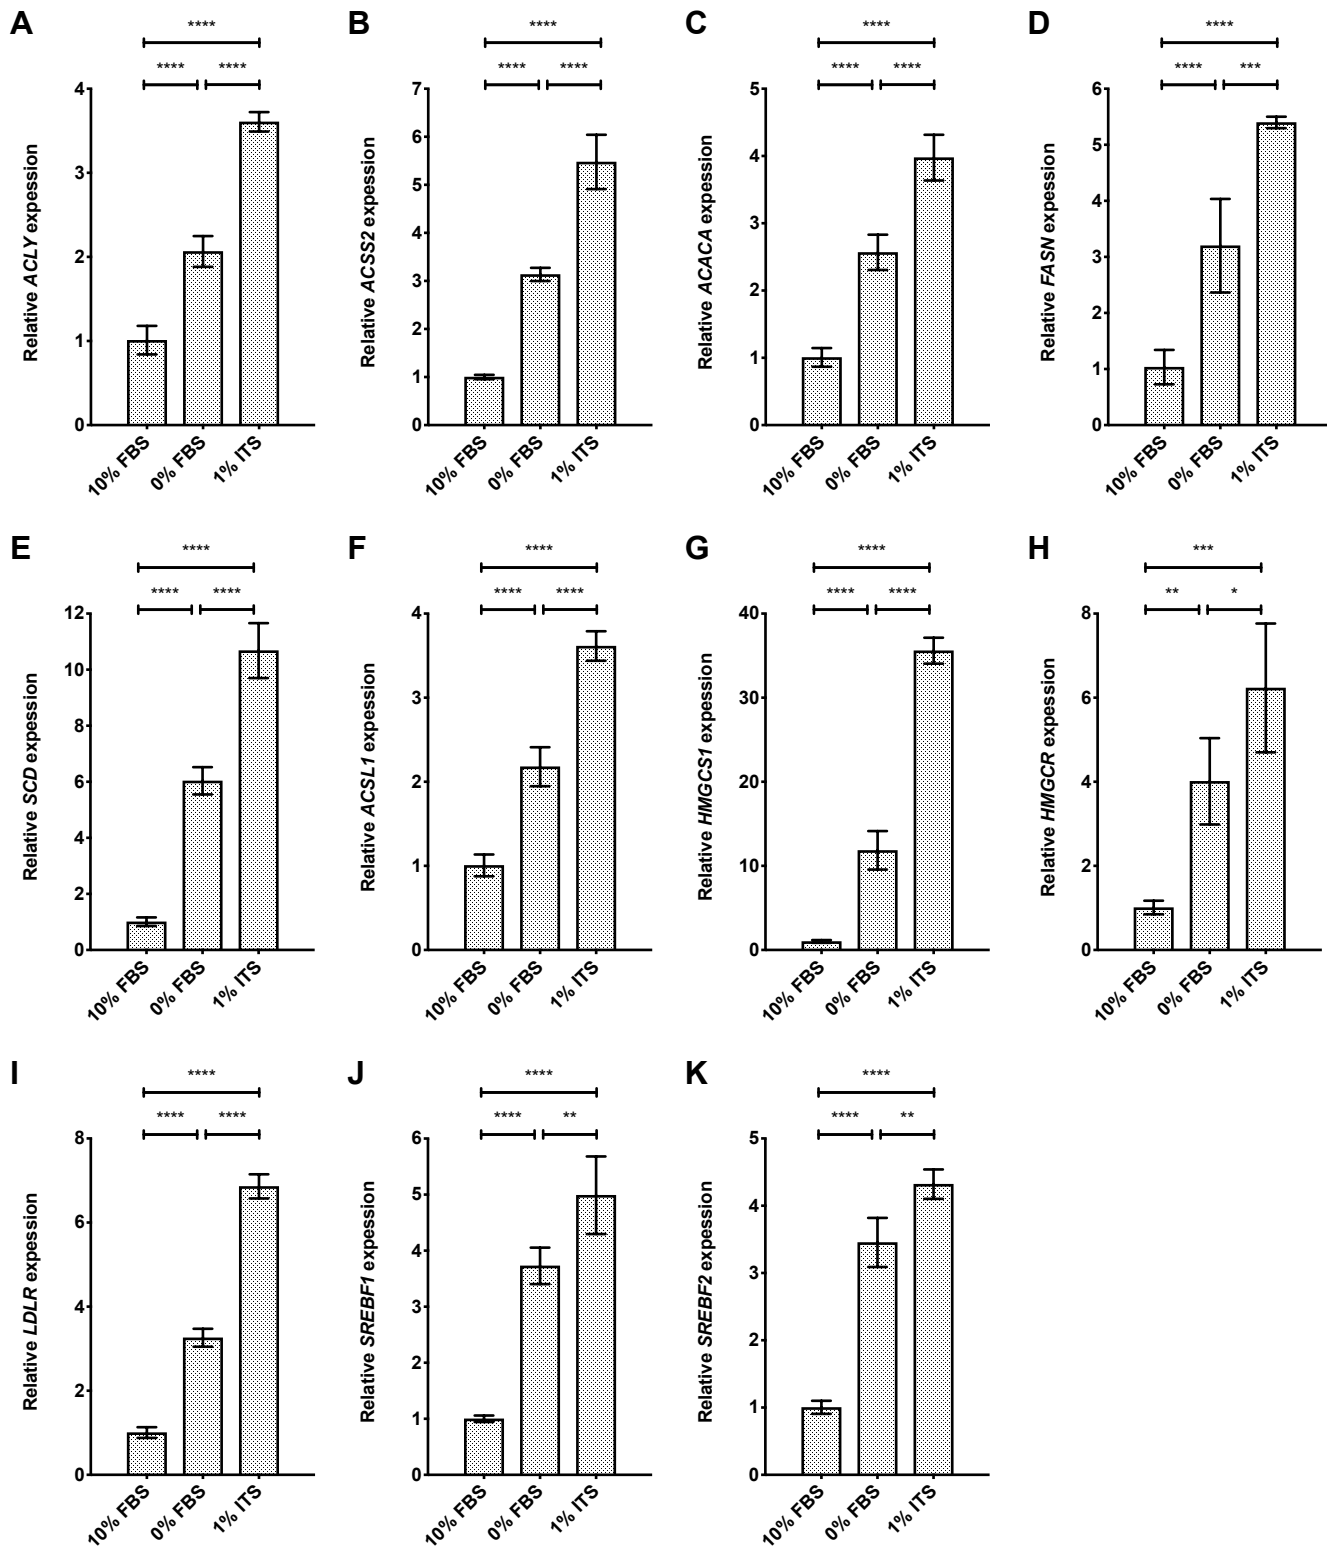

Figure 3.

A

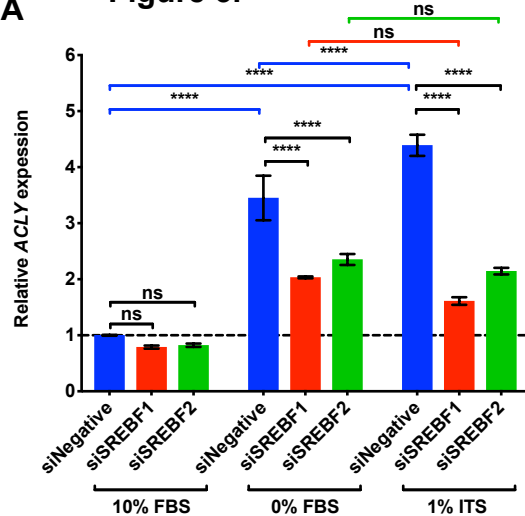

B

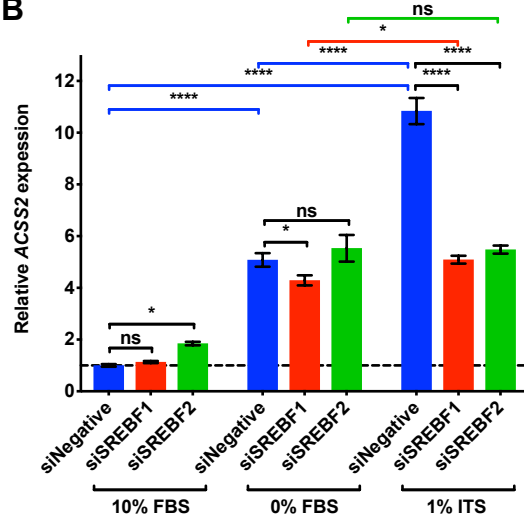

C

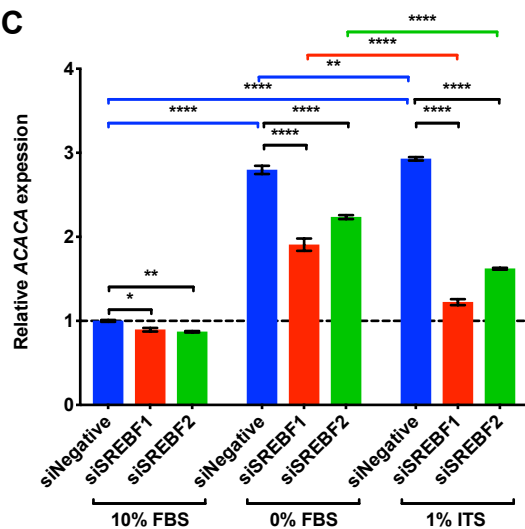

D

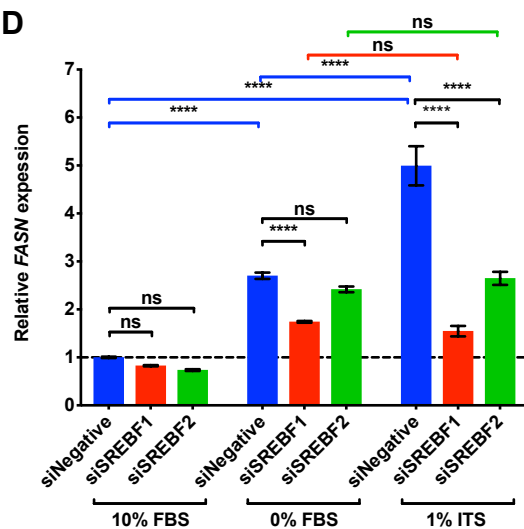

E

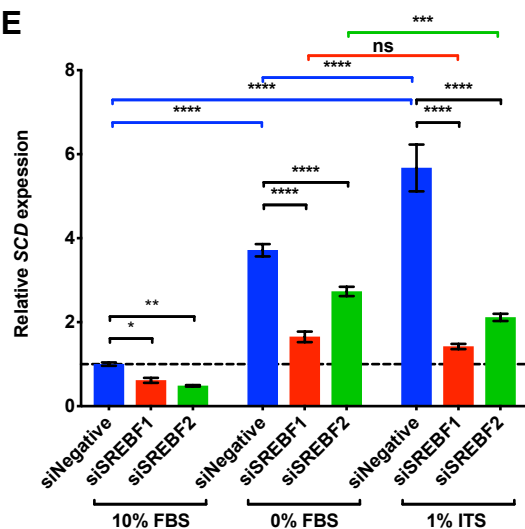

F

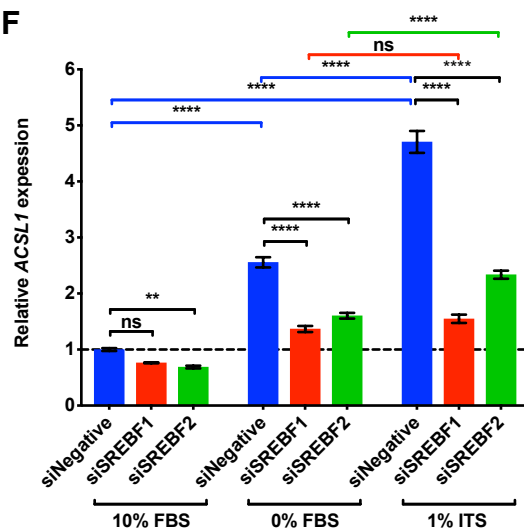

**Figure 4.**

**A**

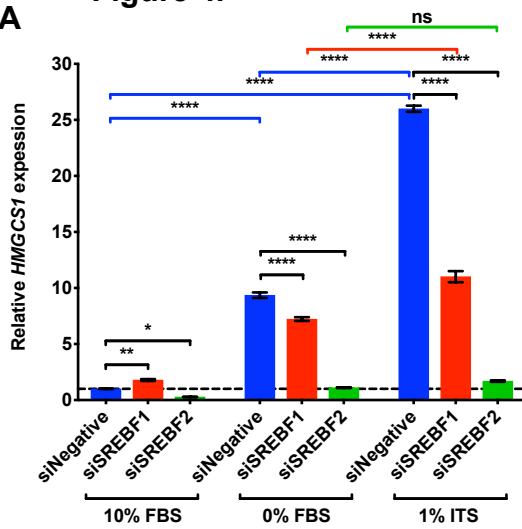

**B**

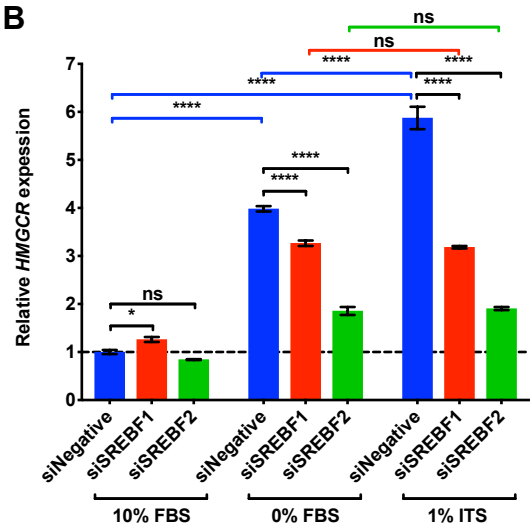

**C**

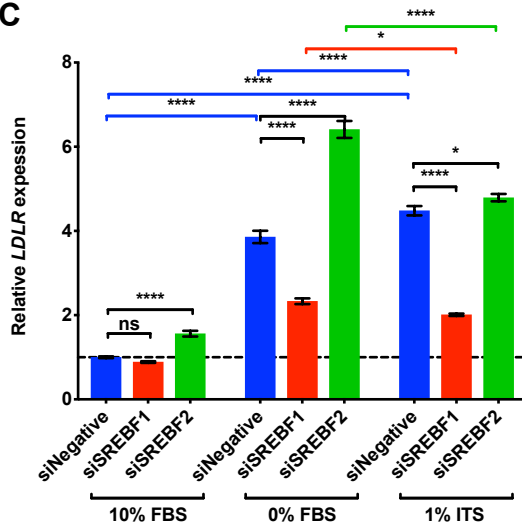

**D**

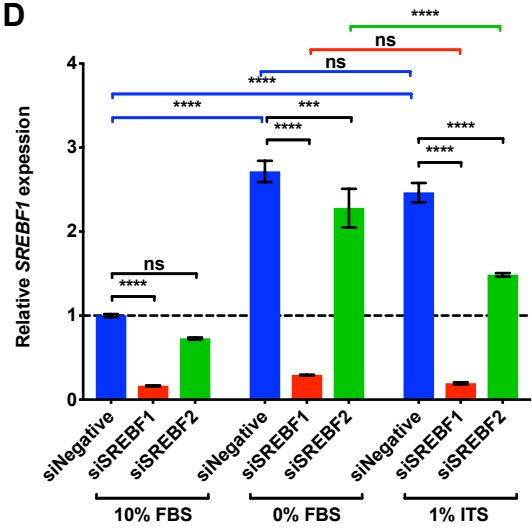

**E**

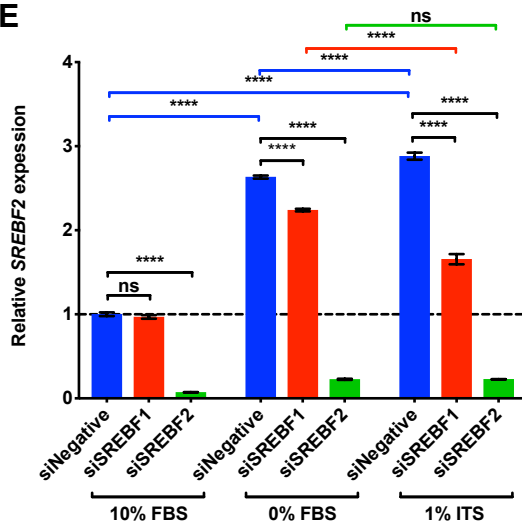



**Figure 5.**

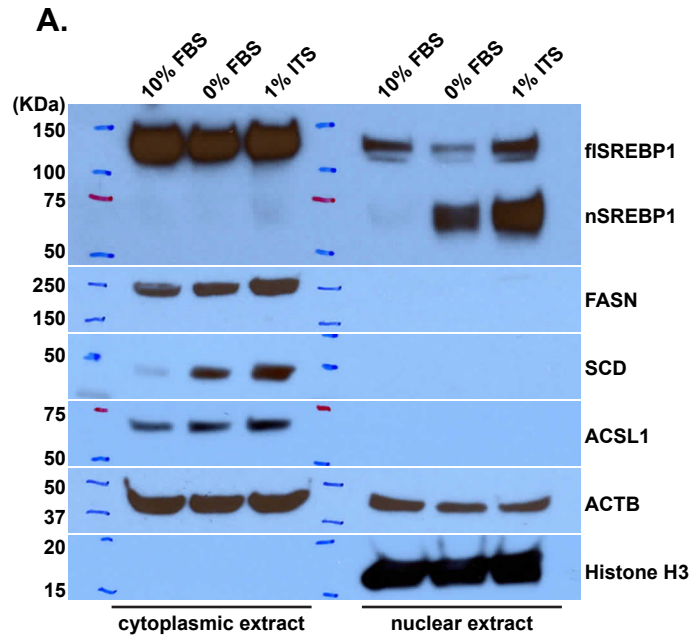

**Figure 6.**

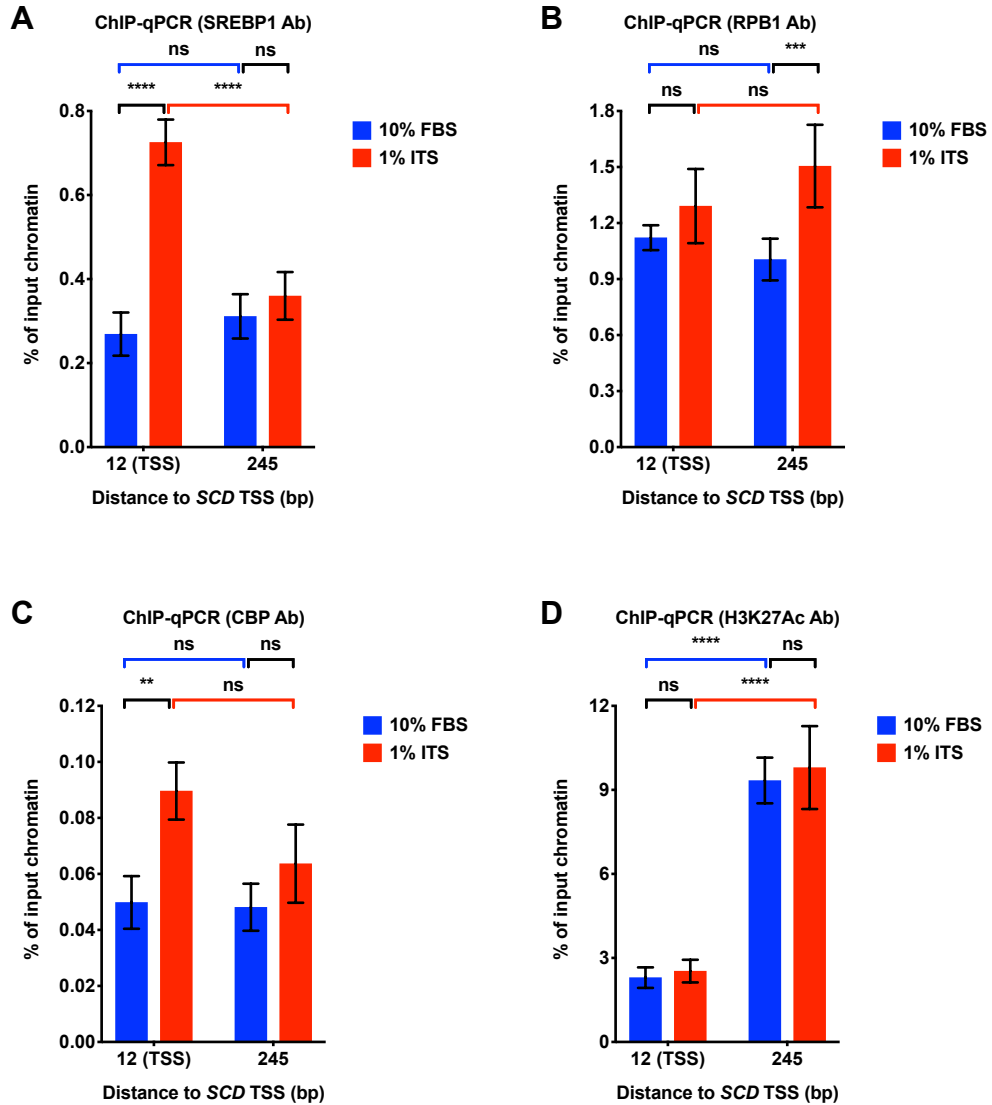

Source: http://biorxiv.org/content/10.1101/479964v1.full.pdf
